# Supplementary material for: Physiological Roles of ArcA, Crp, and EtrA and Their Interactive Control on Aerobic and Anaerobic Respiration in Shewanella oneidensis
Source: PLoS One. 2010 Dec 28;5(12):e15295. doi: 10.1371/journal.pone.0015295 (PMC3011009; doi:10.1371/journal.pone.0015295)
Supplement: Table S2 — Predicted ArcA binding sites in the genome of S. oneidensis. (XLS) [file pone.0015295.s002.xls]

## Sheet: Sheet1
Table S2. ArcA-binding sites
seq_id 5	strand	start	end	sequence	weight	proba_M	proba_B	Pval	ln_Pval	sig
SO_1661	D	-219	-205	GTTAAATAATTGTTA	13.9	0.0078	6.9e-09	3.1e-08	-17.295	7.511
SO_1622	R	-56	-42	GTTACTTTATTGTTA	13.6	0.0036	4.5e-09	6.6e-08	-16.534	7.181
SO_3508	D	-46	-32	GTTAACTCAATGTTA	13.1	0.0014	2.9e-09	1.6e-07	-15.657	6.8
SO_3507	R	-90	-76	GTTAACTCAATGTTA	13.1	0.0014	2.9e-09	1.6e-07	-15.657	6.8
SO_1309	D	-161	-147	GTTACTTAAATGTTA	13.1	0.0021	4.5e-09	1.6e-07	-15.657	6.8
cspD	D	-133	-119	GTTACCTCTTTGTTA	12.8	0.00068	1.9e-09	3.2e-07	-14.955	6.495
clpS	R	-75	-61	GTTACCTCTTTGTTA	12.8	0.00068	1.9e-09	3.2e-07	-14.955	6.495
SO_3342	D	-181	-167	GTTAATTTGTTGTTA	12.3	0.001	4.5e-09	6.9e-07	-14.188	6.162
SO_0806	R	-88	-74	GTTACATATTTGTGA	12.1	0.00052	2.9e-09	9e-07	-13.925	6.048
SO_0805	D	-104	-90	GTTACATATTTGTGA	12.1	0.00052	2.9e-09	9e-07	-13.925	6.048
SO_2597	R	-83	-69	GTAACATCATTGTTA	12	0.00046	2.9e-09	1e-06	-13.771	5.981
SO_1944	R	-65	-51	GTTAAGTAATTGTAA	12	0.00071	4.5e-09	1e-06	-13.771	5.981
SO_1942	D	-270	-256	GTTAAGTAATTGTAA	12	0.00071	4.5e-09	1e-06	-13.771	5.981
aprE	R	-127	-113	GTAAATTAATTGTTA	11.7	0.00082	6.9e-09	1.5e-06	-13.403	5.821
rpsA	R	-21	-7	GTTACTTTAATGTAA	11.6	0.00051	4.5e-09	1.7e-06	-13.288	5.771
SO_4467	R	-29	-15	GTTAATATATTGTGA	11.5	0.00043	4.5e-09	1.9e-06	-13.189	5.728
SO_4466	D	-296	-282	GTTAATATATTGTGA	11.5	0.00043	4.5e-09	1.9e-06	-13.189	5.728
SO_1400	R	-173	-159	GTTATCTCAATGTTA	11.4	0.00027	2.9e-09	2.1e-06	-13.081	5.681
SO_1399	D	-113	-99	GTTATCTCAATGTTA	11.4	0.00027	2.9e-09	2.1e-06	-13.081	5.681
SO_2164	R	-107	-93	GTTACAAAGATGTTA	11.3	0.00023	2.9e-09	2.3e-06	-12.983	5.638
argA	D	-178	-164	GTTAAAAAAATGTGA	11.3	0.00038	4.5e-09	2.3e-06	-12.983	5.638
SO_1967	R	-316	-302	GTTACTTAGTTGTAA	11.2	0.00022	2.9e-09	2.6e-06	-12.875	5.592
SO_3975	D	-98	-84	GTAAAATATTTGTTA	11	0.00042	6.9e-09	3.1e-06	-12.687	5.51
SO_3045	D	-143	-129	GTTAACGTATTGTAA	11	0.00018	2.9e-09	3.1e-06	-12.687	5.51
SO_2858	D	-153	-139	GTAAATTCAATGTTA	10.8	0.00022	4.5e-09	3.8e-06	-12.491	5.425
SO_4339	R	-82	-68	GTTAAATTGCTGTTA	10.6	0.00012	2.9e-09	4.4e-06	-12.325	5.353
SO_2571	D	-157	-143	GTTACAAATTTGTAA	10.6	0.00019	4.5e-09	4.4e-06	-12.325	5.353
SO_2570	R	-214	-200	GTTACAAATTTGTAA	10.6	0.00019	4.5e-09	4.4e-06	-12.325	5.353
SO_3278	R	-41	-27	GTTAATTTTATGTAA	10.4	0.00024	6.9e-09	5.3e-06	-12.149	5.276
SO_3277	D	-164	-150	GTTAATTTTATGTAA	10.4	0.00024	6.9e-09	5.3e-06	-12.149	5.276
SO_3480	R	-57	-43	GTTAGCATAATGTTA	10.3	8.6e-05	2.9e-09	5.7e-06	-12.077	5.245
SO_3099	R	-256	-242	GTTAATACTTTGTGA	10.2	8.3e-05	2.9e-09	6.1e-06	-12.007	5.215
SO_A0050	D	-223	-209	GTTAATAATTTGTAA	10.1	0.00017	6.9e-09	6.5e-06	-11.938	5.185
SO_3659	D	-205	-191	GTAAAATCGATGTTA	10.1	6.9e-05	2.9e-09	6.5e-06	-11.938	5.185
SO_3657	R	-137	-123	GTAAAATCGATGTTA	10.1	6.9e-05	2.9e-09	6.5e-06	-11.938	5.185
SO_0306	D	-192	-178	GTTATTAAATTGTGA	9.9	8.8e-05	4.5e-09	7.5e-06	-11.796	5.123
SO_0115	D	-128	-114	GTTAGCAAGTTGTTA	9.9	3.7e-05	1.9e-09	7.5e-06	-11.796	5.123
SO_0114	R	-206	-192	GTTAGCAAGTTGTTA	9.9	3.7e-05	1.9e-09	7.5e-06	-11.796	5.123
SO_2460	D	-39	-25	GTAAACAAATTGTAA	9.7	7.4e-05	4.5e-09	8.7e-06	-11.653	5.061
SO_1267	R	-115	-101	GTTAAGCACTTGTTA	9.7	3e-05	1.9e-09	8.7e-06	-11.653	5.061
SO_0640	R	-268	-254	GTAAAAAAATTGTAA	9.7	0.00011	6.9e-09	8.7e-06	-11.653	5.061
SO_0639	D	-195	-181	GTAAAAAAATTGTAA	9.7	0.00011	6.9e-09	8.7e-06	-11.653	5.061
SO_4304	R	-47	-33	GTTAAATAATTGCTA	9.6	6.4e-05	4.5e-09	9.5e-06	-11.567	5.024
SO_3952	R	-20	-6	GTTACCACTCTGTTA	9.6	1.8e-05	1.3e-09	9.5e-06	-11.567	5.024
SO_1673	R	-200	-186	GTTAGTTTTTTGTGA	9.6	4.2e-05	2.9e-09	9.5e-06	-11.567	5.024
mdeA	R	-194	-180	GTAACTAAGTTGTTA	9.6	4.4e-05	2.9e-09	9.5e-06	-11.567	5.024
fliE	D	-149	-135	GTTACCTTATTGGTA	9.6	2.9e-05	1.9e-09	9.5e-06	-11.567	5.024
SO_3562	D	-227	-213	GTTAAAACGATGTAA	9.5	4.1e-05	2.9e-09	1e-05	-11.5	4.995
SO_3561	R	-75	-61	GTTAAAACGATGTAA	9.5	4.1e-05	2.9e-09	1e-05	-11.5	4.995
SO_1295	D	-230	-216	GTAACTTATTTGTAA	9.4	5.6e-05	4.5e-09	1.1e-05	-11.433	4.965
SO_0867	D	-328	-314	GTAATTTAAATGTTA	9.4	8.3e-05	6.9e-09	1.1e-05	-11.433	4.965
SO_0866	R	-136	-122	GTAATTTAAATGTTA	9.4	8.3e-05	6.9e-09	1.1e-05	-11.433	4.965
SO_A0182	R	-155	-141	GTAATTTTAATGTTA	9.3	7.5e-05	6.9e-09	1.2e-05	-11.363	4.935
SO_4015	D	-205	-191	GTTAACTCATTGTTT	9.3	3.3e-05	2.9e-09	1.2e-05	-11.363	4.935
SO_2435	D	-122	-108	GTAAACGCTTTGTTA	9.3	2e-05	1.9e-09	1.2e-05	-11.363	4.935
SO_2434	R	-43	-29	GTAAACGCTTTGTTA	9.3	2e-05	1.9e-09	1.2e-05	-11.363	4.935
cpdB	R	-257	-243	GTTAATTAATTGTTG	9.2	4.3e-05	4.5e-09	1.3e-05	-11.289	4.903
SO_4457	R	-63	-49	GTTGCCTAAATGTTA	9.1	1.7e-05	1.9e-09	1.3e-05	-11.22	4.873
SO_2100	R	-216	-202	GTTAATTAAATGTCA	9	3.5e-05	4.5e-09	1.4e-05	-11.144	4.84
hoxK	D	-147	-133	GTTAATTAAATGTCA	9	3.5e-05	4.5e-09	1.4e-05	-11.144	4.84
SO_4618	D	-21	-7	GTAATATAAATGTGA	8.9	3.2e-05	4.5e-09	1.6e-05	-11.073	4.809
SO_1486	R	-19	-5	GTAACCTCACTGTGA	8.9	6.1e-06	8.2e-10	1.6e-05	-11.073	4.809
SO_2244	D	-71	-57	GTTAGGTTGTTGTAA	8.8	1.3e-05	1.9e-09	1.7e-05	-11.006	4.78
SO_A0065	R	-169	-155	CTTAATTAATTGTTA	8.7	4.3e-05	6.9e-09	1.8e-05	-10.944	4.753
SO_3331	R	-102	-88	GTAAACCCTATGTTA	8.7	1.1e-05	1.9e-09	1.8e-05	-10.944	4.753
SO_2575	R	-81	-67	GTAATTTAATTGTAA	8.7	4.1e-05	6.9e-09	1.8e-05	-10.944	4.753
SO_0554	R	-199	-185	GTTATTATTTTGTGA	8.7	2.8e-05	4.5e-09	1.8e-05	-10.944	4.753
SO_0553	D	-36	-22	GTTATTATTTTGTGA	8.7	2.8e-05	4.5e-09	1.8e-05	-10.944	4.753
sfcA	R	-177	-163	GTTAATTGATTGTAA	8.7	2.7e-05	4.5e-09	1.8e-05	-10.944	4.753
minC	D	-57	-43	GTAATTTAATTGTAA	8.7	4.1e-05	6.9e-09	1.8e-05	-10.944	4.753
SO_3689	D	-44	-30	GTTACTTTAAGGTTA	8.6	1.6e-05	2.9e-09	1.9e-05	-10.87	4.721
SO_3591	D	-40	-26	GTTAGGCTGTTGTTA	8.6	7.1e-06	1.3e-09	1.9e-05	-10.87	4.721
SO_0039	R	-133	-119	GTAATGTCATTGTGA	8.6	1e-05	1.9e-09	1.9e-05	-10.87	4.721
aroE	D	-71	-57	GTAATGTCATTGTGA	8.6	1e-05	1.9e-09	1.9e-05	-10.87	4.721
SO_4160	D	-42	-28	GTTACCTTTTTGTTT	8.5	1.5e-05	2.9e-09	2.1e-05	-10.786	4.684
SO_0786	R	-31	-17	TTTAAATAAATGTTA	8.5	5.3e-05	1.1e-08	2.1e-05	-10.786	4.684
SO_2727	D	-220	-206	GTTATTCAAATGTAA	8.4	2e-05	4.5e-09	2.2e-05	-10.704	4.649
SO_1898	R	-138	-124	GTTAACTTTTTGATA	8.4	2e-05	4.5e-09	2.2e-05	-10.704	4.649
SO_1006	D	-243	-229	GTTATTGAAATGTAA	8.4	2e-05	4.5e-09	2.2e-05	-10.704	4.649
SO_1004	R	-199	-185	GTTATTGAAATGTAA	8.4	2e-05	4.5e-09	2.2e-05	-10.704	4.649
SO_2782	R	-166	-152	GTTAATTCAATGTTG	8.3	1.2e-05	2.9e-09	2.4e-05	-10.645	4.623
SO_2781	D	-106	-92	GTTAATTCAATGTTG	8.3	1.2e-05	2.9e-09	2.4e-05	-10.645	4.623
SO_4180	D	-272	-258	GTTACTTATTTGTTT	8.2	1.7e-05	4.5e-09	2.6e-05	-10.572	4.592
SO_A0056	D	-47	-33	GTAAAGATACTGTTA	8.1	1e-05	2.9e-09	2.8e-05	-10.493	4.557
SO_3449	R	-42	-28	GTTAATTATTTGGTA	8.1	1.5e-05	4.5e-09	2.8e-05	-10.493	4.557
SO_2753	R	-136	-122	TTTAACAAATTGTTA	8.1	2.3e-05	6.9e-09	2.8e-05	-10.493	4.557
SO_0854	R	-97	-83	GTTAATTTATTGCGA	8.1	1e-05	2.9e-09	2.8e-05	-10.493	4.557
SO_0864	D	-191	-177	GTTAATTTTTTGTTT	8	2.1e-05	6.9e-09	3e-05	-10.407	4.52
hsdM-1	R	-298	-284	GTTAATAAAATGTCA	7.9	1.2e-05	4.5e-09	3.3e-05	-10.326	4.485
SO_4734	R	-284	-270	GGTAATTAATTGTAA	7.8	1.1e-05	4.5e-09	3.5e-05	-10.246	4.45
SO_4143	D	-130	-116	GTTAACCCATTGATA	7.8	4.7e-06	1.9e-09	3.5e-05	-10.246	4.45
SO_3299	D	-66	-52	GTTAATTAATTTTGA	7.8	1.7e-05	6.9e-09	3.5e-05	-10.246	4.45
SO_0948	R	-270	-256	GGTAACGCATTGTTA	7.8	3.1e-06	1.3e-09	3.5e-05	-10.246	4.45
brnQ	D	-356	-342	GGTAACGCATTGTTA	7.8	3.1e-06	1.3e-09	3.5e-05	-10.246	4.45
SO_2083	D	-175	-161	GTAACCAAACTGTAA	7.7	4.3e-06	1.9e-09	3.8e-05	-10.177	4.42
SO_0826	D	-261	-247	GTTTAGTTTTTGTTA	7.7	1e-05	4.5e-09	3.8e-05	-10.177	4.42
pykA	R	-111	-97	GTTTCAAAATTGTGA	7.7	6.5e-06	2.9e-09	3.8e-05	-10.177	4.42
ppc	R	-332	-318	GTGACTTAGATGTTA	7.7	4.2e-06	1.9e-09	3.8e-05	-10.177	4.42
pheS	R	-309	-295	GTAACCAAACTGTAA	7.7	4.3e-06	1.9e-09	3.8e-05	-10.177	4.42
argC	D	-381	-367	GTGACTTAGATGTTA	7.7	4.2e-06	1.9e-09	3.8e-05	-10.177	4.42
SO_3301	R	-196	-182	ATTAAACAATTGTTA	7.6	1.4e-05	6.9e-09	4.2e-05	-10.088	4.381
SO_1560	D	-35	-21	GTTACAAATTAGTTA	7.6	8.7e-06	4.5e-09	4.2e-05	-10.088	4.381
SO_0438	R	-27	-13	GTTACTAATGTGTTA	7.6	6.1e-06	2.9e-09	4.2e-05	-10.088	4.381
SO_0316	D	-281	-267	GTTAATTCATTTTGA	7.6	8.6e-06	4.5e-09	4.2e-05	-10.088	4.381
SO_4570	R	-147	-133	GTTAATAAAATGTTT	7.5	1.2e-05	6.9e-09	4.5e-05	-10.002	4.344
SO_2907	R	-179	-165	GTTAATAAAATGTTT	7.5	1.2e-05	6.9e-09	4.5e-05	-10.002	4.344
SO_2187	R	-211	-197	ATTAACAAAATGTTA	7.5	1.2e-05	6.9e-09	4.5e-05	-10.002	4.344
SO_2047	D	-119	-105	GTTACATTCTTGTTG	7.5	3.4e-06	1.9e-09	4.5e-05	-10.002	4.344
SO_1427	R	-246	-232	GTTAATAAAATGTTT	7.5	1.2e-05	6.9e-09	4.5e-05	-10.002	4.344
SO_0787	D	-241	-227	GTTAACTTAAAGTAA	7.5	8.4e-06	4.5e-09	4.5e-05	-10.002	4.344
SO_0548	D	-108	-94	GTTACTTAGATGATA	7.5	5.6e-06	2.9e-09	4.5e-05	-10.002	4.344
SO_0427	D	-80	-66	GTGACGTTAATGTGA	7.5	2.4e-06	1.3e-09	4.5e-05	-10.002	4.344
SO_0062	R	-188	-174	GTGAAGTAAATGTGA	7.5	3.5e-06	1.9e-09	4.5e-05	-10.002	4.344
pspF	R	-90	-76	GTTAATAAAATGTTT	7.5	1.2e-05	6.9e-09	4.5e-05	-10.002	4.344
pspA	D	-102	-88	GTTAATAAAATGTTT	7.5	1.2e-05	6.9e-09	4.5e-05	-10.002	4.344
SO_1326	R	-336	-322	GTTACATCTTAGTGA	7.4	3.3e-06	1.9e-09	4.9e-05	-9.926	4.311
SO_0516	D	-26	-12	CTTACTGAATTGTTA	7.4	4.6e-06	2.9e-09	4.9e-05	-9.926	4.311
SO_0208	R	-44	-30	GATAAATAACTGTTA	7.4	7.6e-06	4.5e-09	4.9e-05	-9.926	4.311
plsB	R	-97	-83	GTTAAAAAGTGGTTA	7.4	4.6e-06	2.9e-09	4.9e-05	-9.926	4.311
lexA	D	-79	-65	GTTAAAAAGTGGTTA	7.4	4.6e-06	2.9e-09	4.9e-05	-9.926	4.311
gltB	D	-265	-251	GTTACATCTTAGTGA	7.4	3.3e-06	1.9e-09	4.9e-05	-9.926	4.311
SO_4414	D	-108	-94	GTTGCATCCTTGTTA	7.3	1.9e-06	1.3e-09	5.2e-05	-9.855	4.28
SO_2339	D	-84	-70	GTTAACGTAATGTTC	7.3	3e-06	1.9e-09	5.2e-05	-9.855	4.28
SO_1766	R	-290	-276	GTACCTTTATTGTTA	7.3	4.5e-06	2.9e-09	5.2e-05	-9.855	4.28
SO_0714	R	-84	-70	GTTACACCAATGCTA	7.3	1.9e-06	1.3e-09	5.2e-05	-9.855	4.28
dcuB	R	-187	-173	GTTGCATCCTTGTTA	7.3	1.9e-06	1.3e-09	5.2e-05	-9.855	4.28
SO_4356	D	-170	-156	GTTAAATAAATTTAA	7.2	1.4e-05	1.1e-08	5.7e-05	-9.775	4.245
SO_2241	R	-115	-101	GTTAACAAATGGTAA	7.2	3.9e-06	2.9e-09	5.7e-05	-9.775	4.245
SO_2240	D	-245	-231	GTTAACAAATGGTAA	7.2	3.9e-06	2.9e-09	5.7e-05	-9.775	4.245
fadD-2	R	-189	-175	GTTAAGTCTTTATTA	7.2	5.9e-06	4.5e-09	5.7e-05	-9.775	4.245
SO_3849	D	-76	-62	GTTGCTATTTTGTTA	7.1	3.5e-06	2.9e-09	6.1e-05	-9.701	4.213
SO_2297	R	-191	-177	TTAACATCATTGTTA	7.1	5.7e-06	4.5e-09	6.1e-05	-9.701	4.213
SO_2078	R	-137	-123	TTTAACATATTGTGA	7.1	5.2e-06	4.5e-09	6.1e-05	-9.701	4.213
SO_2048	R	-233	-219	GTTAATTTTTTGCGA	7.1	3.5e-06	2.9e-09	6.1e-05	-9.701	4.213
SO_2032	R	-209	-195	GTTAATACCCTGTGA	7.1	1.5e-06	1.3e-09	6.1e-05	-9.701	4.213
SO_1949	R	-28	-14	GTTACTCTAATGATA	7.1	3.5e-06	2.9e-09	6.1e-05	-9.701	4.213
SO_1948	D	-207	-193	GTTACTCTAATGATA	7.1	3.5e-06	2.9e-09	6.1e-05	-9.701	4.213
SO_1750	D	-55	-41	GTTAAATATTTATGA	7.1	8.7e-06	6.9e-09	6.1e-05	-9.701	4.213
SO_1369	D	-144	-130	GTCACGTTTTTGTGA	7.1	1.5e-06	1.3e-09	6.1e-05	-9.701	4.213
SO_0808	D	-295	-281	GTTTAATAGTTGTAA	7.1	5.4e-06	4.5e-09	6.1e-05	-9.701	4.213
SO_0563	R	-112	-98	GTAAATATCTTGTAA	7.1	5.3e-06	4.5e-09	6.1e-05	-9.701	4.213
SO_0458	D	-140	-126	TTTAAATAGTTGTGA	7.1	5.3e-06	4.5e-09	6.1e-05	-9.701	4.213
pepA-2	R	-126	-112	GTCACGTTTTTGTGA	7.1	1.5e-06	1.3e-09	6.1e-05	-9.701	4.213
maa	D	-114	-100	GTTAGCTAAATGGTA	7.1	2.2e-06	1.9e-09	6.1e-05	-9.701	4.213
hisG	R	-32	-18	GTTAACATATTGAAA	7.1	5.4e-06	4.5e-09	6.1e-05	-9.701	4.213
cobS	R	-65	-51	GTTAGCTAAAAGTTA	7.1	3.4e-06	2.9e-09	6.1e-05	-9.701	4.213
SO_4022	D	-183	-169	GTTAAATTTTTTTGA	7	7.9e-06	6.9e-09	6.6e-05	-9.624	4.18
SO_3987	D	-241	-227	GCAAACTTAATGTTA	7	3.2e-06	2.9e-09	6.6e-05	-9.624	4.18
SO_2929	R	-31	-17	GTTAACCATTTGCTA	7	2.1e-06	1.9e-09	6.6e-05	-9.624	4.18
SO_2602	R	-160	-146	GTTAACAATTTTTTA	7	7.8e-06	6.9e-09	6.6e-05	-9.624	4.18
SO_2500	R	-376	-362	GTTAGTTTGCTGTAA	7	2e-06	1.9e-09	6.6e-05	-9.624	4.18
arcA	R	-356	-342	GCAAACTTAATGTTA	7	3.2e-06	2.9e-09	6.6e-05	-9.624	4.18
SO_1320	R	-26	-12	TTTAACCTAATGTTA	6.9	4.6e-06	4.5e-09	7.1e-05	-9.556	4.15
SO_0542	D	-229	-215	TTTAAGTCATTGTAA	6.9	4.5e-06	4.5e-09	7.1e-05	-9.556	4.15
SO_0418	D	-74	-60	GTCAAACCTTTGTTA	6.9	1.8e-06	1.9e-09	7.1e-05	-9.556	4.15
SO_4454	D	-61	-47	GTTCAATACATGTTA	6.8	2.7e-06	2.9e-09	7.6e-05	-9.481	4.118
SO_4238	D	-154	-140	GTTAATTCCTTGCTA	6.8	1.7e-06	1.9e-09	7.6e-05	-9.481	4.118
SO_2736	D	-97	-83	TTTATCTTAATGTTA	6.8	6e-06	6.9e-09	7.6e-05	-9.481	4.118
SO_2189	D	-152	-138	GTGACAGAAATGTGA	6.8	1.1e-06	1.3e-09	7.6e-05	-9.481	4.118
SO_1254	R	-192	-178	GTTAATTATTTGTAT	6.8	6e-06	6.9e-09	7.6e-05	-9.481	4.118
SO_1252	D	-271	-257	GTTAATTATTTGTAT	6.8	6e-06	6.9e-09	7.6e-05	-9.481	4.118
SO_1100	D	-100	-86	GTTAACAATATGTTC	6.8	2.8e-06	2.9e-09	7.6e-05	-9.481	4.118
SO_0673	R	-114	-100	TTTAAATCCTTGTTA	6.8	3.9e-06	4.5e-09	7.6e-05	-9.481	4.118
SO_0044	R	-49	-35	GTTTAATTTATGTGA	6.8	4.3e-06	4.5e-09	7.6e-05	-9.481	4.118
leuA	R	-357	-343	GTTAATTCCTTGCTA	6.8	1.7e-06	1.9e-09	7.6e-05	-9.481	4.118
trpC/F	R	-42	-28	GTTATCTTGTTGTTT	6.7	2.3e-06	2.9e-09	8.2e-05	-9.41	4.087
SO_4270	D	-121	-107	GTTTAGAAGTTGTTA	6.7	2.4e-06	2.9e-09	8.2e-05	-9.41	4.087
SO_4252	R	-26	-12	GTAAAATTATTGTGG	6.7	2.3e-06	2.9e-09	8.2e-05	-9.41	4.087
SO_4146	R	-176	-162	GTTAACATTATGTTT	6.7	3.8e-06	4.5e-09	8.2e-05	-9.41	4.087
SO_4145	D	-102	-88	GTTAACATTATGTTT	6.7	3.8e-06	4.5e-09	8.2e-05	-9.41	4.087
SO_4045	R	-194	-180	GTTAAATATTTCTAA	6.7	5.8e-06	6.9e-09	8.2e-05	-9.41	4.087
SO_3819	D	-91	-77	GTTAAGGTAATGATA	6.7	2.4e-06	2.9e-09	8.2e-05	-9.41	4.087
SO_2865	D	-60	-46	GTTATATTAATTTTA	6.7	9e-06	1.1e-08	8.2e-05	-9.41	4.087
SO_1382	D	-199	-185	TTTAAAGCAATGTTA	6.7	3.8e-06	4.5e-09	8.2e-05	-9.41	4.087
SO_1381	R	-163	-149	TTTAAAGCAATGTTA	6.7	3.8e-06	4.5e-09	8.2e-05	-9.41	4.087
SO_0916	R	-36	-22	GTTACGCCAATGTTG	6.7	6.4e-07	8.2e-10	8.2e-05	-9.41	4.087
pflB	D	-276	-262	GTAAGAGCTATGTTA	6.7	1.6e-06	1.9e-09	8.2e-05	-9.41	4.087
iciA	R	-67	-53	GTTATATTAATTTTA	6.7	9e-06	1.1e-08	8.2e-05	-9.41	4.087
hslO	D	-23	-9	GTTACCTAACAGTGA	6.7	9.8e-07	1.3e-09	8.2e-05	-9.41	4.087
gnd	R	-228	-214	GTGAAGGCAATGTTA	6.7	9.8e-07	1.3e-09	8.2e-05	-9.41	4.087
topA	R	-137	-123	GTTGAAAAAATGTAA	6.6	3.2e-06	4.5e-09	8.8e-05	-9.336	4.055
SO_4019	R	-286	-272	GTAAAATATTTGTTT	6.6	5.2e-06	6.9e-09	8.8e-05	-9.336	4.055
SO_4018	D	-98	-84	GTAAAATATTTGTTT	6.6	5.2e-06	6.9e-09	8.8e-05	-9.336	4.055
SO_2427	R	-177	-163	GTTGTTTAATTGTGA	6.6	2.1e-06	2.9e-09	8.8e-05	-9.336	4.055
SO_1863	R	-121	-107	GTTACTCAGTTGTTT	6.6	1.5e-06	1.9e-09	8.8e-05	-9.336	4.055
cat2	D	-186	-172	GTTCCTTTTATGTGA	6.6	1.4e-06	1.9e-09	8.8e-05	-9.336	4.055
astB	D	-209	-195	GTTGAAAAAATGTAA	6.6	3.2e-06	4.5e-09	8.8e-05	-9.336	4.055
SO_4166	D	-42	-28	GTGACCCTGATGTTA	6.5	5.3e-07	8.2e-10	9.5e-05	-9.266	4.024
SO_3597	R	-93	-79	GTTTGATTTTTGTTA	6.5	3e-06	4.5e-09	9.5e-05	-9.266	4.024
SO_3596	D	-69	-55	GTTTGATTTTTGTTA	6.5	3e-06	4.5e-09	9.5e-05	-9.266	4.024
SO_1860	R	-141	-127	GTTAACTAGATGAAA	6.5	1.9e-06	2.9e-09	9.5e-05	-9.266	4.024
SO_0645	D	-25	-11	GTTAGGTTATTTTTA	6.5	3e-06	4.5e-09	9.5e-05	-9.266	4.024
SO_0346	D	-133	-119	GTAAACATATTGTTG	6.5	2.1e-06	2.9e-09	9.5e-05	-9.266	4.024
SO_0002	R	-134	-120	GGTAAATAGATGTAA	6.5	1.9e-06	2.9e-09	9.5e-05	-9.266	4.024
nrdR	D	-187	-173	GTTAATTTTATGGGA	6.5	1.9e-06	2.9e-09	9.5e-05	-9.266	4.024
ndk	D	-191	-177	GATATATCGTTGTTA	6.5	1.9e-06	2.9e-09	9.5e-05	-9.266	4.024
mioC	D	-60	-46	GGTAAATAGATGTAA	6.5	1.9e-06	2.9e-09	9.5e-05	-9.266	4.024
lrp	D	-133	-119	GTTATTTTATCGTGA	6.5	1.9e-06	2.9e-09	9.5e-05	-9.266	4.024
SO_4385	D	-95	-81	GTTTACAACTTGTTA	6.4	1.8e-06	2.9e-09	0.0001	-9.192	3.992
SO_3733	D	-80	-66	GTGATTTTGTTGTTA	6.4	1.7e-06	2.9e-09	0.0001	-9.192	3.992
SO_3015	R	-17	-3	GTTATCCCCATGTAA	6.4	7.9e-07	1.3e-09	0.0001	-9.192	3.992
SO_2194	D	-205	-191	ATTAAGTTTTTGTGA	6.4	2.7e-06	4.5e-09	0.0001	-9.192	3.992
SO_2193	R	-42	-28	ATTAAGTTTTTGTGA	6.4	2.7e-06	4.5e-09	0.0001	-9.192	3.992
SO_0881	R	-39	-25	GTTAAATTACTGTGC	6.4	1.2e-06	1.9e-09	0.0001	-9.192	3.992
SO_0880	D	-87	-73	GTTAAATTACTGTGC	6.4	1.2e-06	1.9e-09	0.0001	-9.192	3.992
SO_0466	D	-214	-200	GTTATCTGTTTGTAA	6.4	1.7e-06	2.9e-09	0.0001	-9.192	3.992
SO_0078	R	-42	-28	ATTAAGTAGTTGTGA	6.4	1.8e-06	2.9e-09	0.0001	-9.192	3.992
SO_0066	R	-398	-384	GATAAAAACTTGTTA	6.4	2.6e-06	4.5e-09	0.0001	-9.192	3.992
rne	R	-334	-320	GTTAAAGTAAGGTGA	6.4	1.2e-06	1.9e-09	0.0001	-9.192	3.992
repA	R	-103	-89	GTAATAGTTTTGTAA	6.4	2.7e-06	4.5e-09	0.0001	-9.192	3.992
hypB	R	-96	-82	ATTACGCTAATGTTA	6.4	1.8e-06	2.9e-09	0.0001	-9.192	3.992
cysT-1	R	-43	-29	GTTAATCCAATATTA	6.4	2.6e-06	4.5e-09	0.0001	-9.192	3.992
ccpA	R	-127	-113	ATTAAGTTTTTGTGA	6.4	2.7e-06	4.5e-09	0.0001	-9.192	3.992
aroG	D	-164	-150	TTTAAAAATATGTTA	6.4	6.4e-06	1.1e-08	0.0001	-9.192	3.992
